# Supplementary material for: Graded perturbations of metabolism in multiple regions of human brain in Alzheimer's disease: Snapshot of a pervasive metabolic disorder
Source: PubMed Central journal article supplement (PMC4856736; doi:10.1016/j.bbadis.2016.03.001), 2016-06
Supplement: mmc4.pdf [file mmc4.pdf]

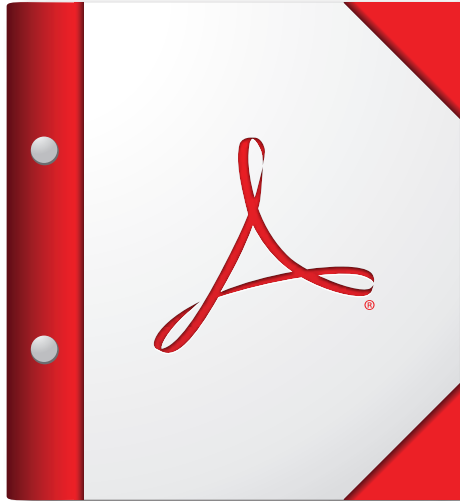

**For the best experience, open this PDF portfolio in  
Acrobat 9 or Adobe Reader 9, or later.**

[Get Adobe Reader Now!](#)
